# Supplementary material for: The therapeutic relevance of a BRCA2 mutation in a patient with recurrent thymoma: a case report
Source: PubMed Central journal article supplement — Mediastinum. 2022 Dec 25;6:40. doi: 10.21037/med-22-9 (PMC9792822; doi:10.21037/med-22-9), 2022-12-25
Supplement: med-06-40-coif.pdf [file med-06-40-coif.pdf]

ICMJE DISCLOSURE FORM

Date: August 2, 2021

Your Name: Samantha Sigurdson

Manuscript Title: The Therapeutic Relevance of a *BRCA2* Mutation in a Patient with Recurrent Thymoma: A Case Report

Manuscript number (if known): \_\_\_\_\_

In the interest of transparency, we ask you to disclose all relationships/activities/interests listed below that are related to the content of your manuscript. "Related" means any relation with for-profit or not-for-profit third parties whose interests may be affected by the content of the manuscript. Disclosure represents a commitment to transparency and does not necessarily indicate a bias. If you are in doubt about whether to list a relationship/activity/interest, it is preferable that you do so.

The following questions apply to the author's relationships/activities/interests as they relate to the current manuscript only.

The author's relationships/activities/interests should be defined broadly. For example, if your manuscript pertains to the epidemiology of hypertension, you should declare all relationships with manufacturers of antihypertensive medication, even if that medication is not mentioned in the manuscript.

In item #1 below, report all support for the work reported in this manuscript without time limit. For all other items, the time frame for disclosure is the past 36 months.

|                                                           |                                                                                                                                                                                | Name all entities with whom you have this relationship or indicate none (add rows as needed) | Specifications/Comments (e.g., if payments were made to you or to your institution) |
|-----------------------------------------------------------|--------------------------------------------------------------------------------------------------------------------------------------------------------------------------------|----------------------------------------------------------------------------------------------|-------------------------------------------------------------------------------------|
| <b>Time frame: Since the initial planning of the work</b> |                                                                                                                                                                                |                                                                                              |                                                                                     |
| 1                                                         | All support for the present manuscript (e.g., funding, provision of study materials, medical writing, article processing charges, etc.)<br><b>No time limit for this item.</b> | X None                                                                                       |                                                                                     |
|                                                           |                                                                                                                                                                                |                                                                                              |                                                                                     |
|                                                           |                                                                                                                                                                                |                                                                                              |                                                                                     |
|                                                           |                                                                                                                                                                                |                                                                                              |                                                                                     |
|                                                           |                                                                                                                                                                                |                                                                                              |                                                                                     |
|                                                           |                                                                                                                                                                                |                                                                                              |                                                                                     |
| <b>Time frame: past 36 months</b>                         |                                                                                                                                                                                |                                                                                              |                                                                                     |
| 2                                                         | Grants or contracts from any entity (if not indicated in item #1 above).                                                                                                       | X None                                                                                       |                                                                                     |
|                                                           |                                                                                                                                                                                |                                                                                              |                                                                                     |
|                                                           |                                                                                                                                                                                |                                                                                              |                                                                                     |
| 3                                                         | Royalties or licenses                                                                                                                                                          | X None                                                                                       |                                                                                     |
|                                                           |                                                                                                                                                                                |                                                                                              |                                                                                     |
|                                                           |                                                                                                                                                                                |                                                                                              |                                                                                     |

|    |                                                                                                              |        |  |
|----|--------------------------------------------------------------------------------------------------------------|--------|--|
| 4  | Consulting fees                                                                                              | X None |  |
|    |                                                                                                              |        |  |
|    |                                                                                                              |        |  |
| 5  | Payment or honoraria for lectures, presentations, speakers bureaus, manuscript writing or educational events | X None |  |
|    |                                                                                                              |        |  |
|    |                                                                                                              |        |  |
| 6  | Payment for expert testimony                                                                                 | X None |  |
|    |                                                                                                              |        |  |
|    |                                                                                                              |        |  |
| 7  | Support for attending meetings and/or travel                                                                 | X None |  |
|    |                                                                                                              |        |  |
|    |                                                                                                              |        |  |
| 8  | Patents planned, issued or pending                                                                           | X None |  |
|    |                                                                                                              |        |  |
|    |                                                                                                              |        |  |
| 9  | Participation on a Data Safety Monitoring Board or Advisory Board                                            | X None |  |
|    |                                                                                                              |        |  |
|    |                                                                                                              |        |  |
| 10 | Leadership or fiduciary role in other board, society, committee or advocacy group, paid or unpaid            | X None |  |
|    |                                                                                                              |        |  |
|    |                                                                                                              |        |  |
| 11 | Stock or stock options                                                                                       | X None |  |
|    |                                                                                                              |        |  |
|    |                                                                                                              |        |  |
| 12 | Receipt of equipment, materials, drugs, medical writing, gifts or other services                             | X None |  |
|    |                                                                                                              |        |  |
|    |                                                                                                              |        |  |
| 13 | Other financial or non-financial interests                                                                   | X None |  |
|    |                                                                                                              |        |  |
|    |                                                                                                              |        |  |

Please place an "X" next to the following statement to indicate your agreement:

X I certify that I have answered every question and have not altered the wording of any of the questions on this form.

ICMJE DISCLOSURE FORM

Date: July 30, 2021

Your Name: Edith Michelle Marom

Manuscript Title: The Therapeutic Relevance of a *BRCA2* Mutation in a Patient with Recurrent Thymoma: A Case Report

Manuscript number (if known): \_\_\_\_\_

In the interest of transparency, we ask you to disclose all relationships/activities/interests listed below that are related to the content of your manuscript. "Related" means any relation with for-profit or not-for-profit third parties whose interests may be affected by the content of the manuscript. Disclosure represents a commitment to transparency and does not necessarily indicate a bias. If you are in doubt about whether to list a relationship/activity/interest, it is preferable that you do so.

The following questions apply to the author's relationships/activities/interests as they relate to the current manuscript only.

The author's relationships/activities/interests should be defined broadly. For example, if your manuscript pertains to the epidemiology of hypertension, you should declare all relationships with manufacturers of antihypertensive medication, even if that medication is not mentioned in the manuscript.

In item #1 below, report all support for the work reported in this manuscript without time limit. For all other items, the time frame for disclosure is the past 36 months.

|                                                           |                                                                                                                                                                                | Name all entities with whom you have this relationship or indicate none (add rows as needed) | Specifications/Comments (e.g., if payments were made to you or to your institution) |
|-----------------------------------------------------------|--------------------------------------------------------------------------------------------------------------------------------------------------------------------------------|----------------------------------------------------------------------------------------------|-------------------------------------------------------------------------------------|
| <b>Time frame: Since the initial planning of the work</b> |                                                                                                                                                                                |                                                                                              |                                                                                     |
| 1                                                         | All support for the present manuscript (e.g., funding, provision of study materials, medical writing, article processing charges, etc.)<br><b>No time limit for this item.</b> | <input type="checkbox"/> None<br><br><br><br>                                                |                                                                                     |
| <b>Time frame: past 36 months</b>                         |                                                                                                                                                                                |                                                                                              |                                                                                     |
| 2                                                         | Grants or contracts from any entity (if not indicated in item #1 above).                                                                                                       | <input type="checkbox"/> None<br><br><br>                                                    |                                                                                     |
| 3                                                         | Royalties or licenses                                                                                                                                                          | <input type="checkbox"/> None<br><br><br>                                                    |                                                                                     |
| 4                                                         | Consulting fees                                                                                                                                                                | <input type="checkbox"/> None<br><br><br>                                                    |                                                                                     |

|    |                                                                                                              |                                                   |                                                     |
|----|--------------------------------------------------------------------------------------------------------------|---------------------------------------------------|-----------------------------------------------------|
| 5  | Payment or honoraria for lectures, presentations, speakers bureaus, manuscript writing or educational events | honorarium for a lecture for Boehringer Ingelheim | honorarium paid to me for an imaging lecture I gave |
|    |                                                                                                              |                                                   |                                                     |
|    |                                                                                                              |                                                   |                                                     |
| 6  | Payment for expert testimony                                                                                 | ___ None                                          |                                                     |
|    |                                                                                                              |                                                   |                                                     |
|    |                                                                                                              |                                                   |                                                     |
| 7  | Support for attending meetings and/or travel                                                                 | ___ None                                          |                                                     |
|    |                                                                                                              |                                                   |                                                     |
|    |                                                                                                              |                                                   |                                                     |
| 8  | Patents planned, issued or pending                                                                           | ___ None                                          |                                                     |
|    |                                                                                                              |                                                   |                                                     |
|    |                                                                                                              |                                                   |                                                     |
| 9  | Participation on a Data Safety Monitoring Board or Advisory Board                                            | ___ None                                          |                                                     |
|    |                                                                                                              |                                                   |                                                     |
|    |                                                                                                              |                                                   |                                                     |
| 10 | Leadership or fiduciary role in other board, society, committee or advocacy group, paid or unpaid            | ___ None                                          |                                                     |
|    |                                                                                                              |                                                   |                                                     |
|    |                                                                                                              |                                                   |                                                     |
| 11 | Stock or stock options                                                                                       | ___ None                                          |                                                     |
|    |                                                                                                              |                                                   |                                                     |
|    |                                                                                                              |                                                   |                                                     |
| 12 | Receipt of equipment, materials, drugs, medical writing, gifts or other services                             | ___ None                                          |                                                     |
|    |                                                                                                              |                                                   |                                                     |
|    |                                                                                                              |                                                   |                                                     |
| 13 | Other financial or non-financial interests                                                                   | ___ None                                          |                                                     |
|    |                                                                                                              |                                                   |                                                     |
|    |                                                                                                              |                                                   |                                                     |

Please summarize the above conflict of interest in the following box:

|                                                       |
|-------------------------------------------------------|
| EMM received an honorarium from Boehringer Ingelheim. |
|-------------------------------------------------------|

Please place an "X" next to the following statement to indicate your agreement:

  X   I certify that I have answered every question and have not altered the wording of any of the questions on this form.

## ICMJE DISCLOSURE FORM

Date: August 2, 2021

Your Name: Andreas Rimner

Manuscript Title: The Therapeutic Relevance of a *BRCA2* Mutation in a Patient with Recurrent Thymoma: A Case Report

Manuscript number (if known): \_\_\_\_\_

In the interest of transparency, we ask you to disclose all relationships/activities/interests listed below that are related to the content of your manuscript. "Related" means any relation with for-profit or not-for-profit third parties whose interests may be affected by the content of the manuscript. Disclosure represents a commitment to transparency and does not necessarily indicate a bias. If you are in doubt about whether to list a relationship/activity/interest, it is preferable that you do so.

The following questions apply to the author's relationships/activities/interests as they relate to the current manuscript only.

The author's relationships/activities/interests should be defined broadly. For example, if your manuscript pertains to the epidemiology of hypertension, you should declare all relationships with manufacturers of antihypertensive medication, even if that medication is not mentioned in the manuscript.

In item #1 below, report all support for the work reported in this manuscript without time limit. For all other items, the time frame for disclosure is the past 36 months.

|                                                           |                                                                                                                                                                                | Name all entities with whom you have this relationship or indicate none (add rows as needed) | Specifications/Comments (e.g., if payments were made to you or to your institution) |
|-----------------------------------------------------------|--------------------------------------------------------------------------------------------------------------------------------------------------------------------------------|----------------------------------------------------------------------------------------------|-------------------------------------------------------------------------------------|
| <b>Time frame: Since the initial planning of the work</b> |                                                                                                                                                                                |                                                                                              |                                                                                     |
| 1                                                         | All support for the present manuscript (e.g., funding, provision of study materials, medical writing, article processing charges, etc.)<br><b>No time limit for this item.</b> | ____ None                                                                                    |                                                                                     |
|                                                           |                                                                                                                                                                                |                                                                                              |                                                                                     |
|                                                           |                                                                                                                                                                                |                                                                                              |                                                                                     |
|                                                           |                                                                                                                                                                                |                                                                                              |                                                                                     |
|                                                           |                                                                                                                                                                                |                                                                                              |                                                                                     |
| <b>Time frame: past 36 months</b>                         |                                                                                                                                                                                |                                                                                              |                                                                                     |
| 2                                                         | Grants or contracts from any entity (if not indicated in item #1 above).                                                                                                       | Boehringer Ingelheim, Pfizer, AstraZeneca, Varian Medical Systems, Merck                     | Research grants made to my institution                                              |
|                                                           |                                                                                                                                                                                |                                                                                              |                                                                                     |
| 3                                                         | Royalties or licenses                                                                                                                                                          | ____ None                                                                                    |                                                                                     |
|                                                           |                                                                                                                                                                                |                                                                                              |                                                                                     |
| 4                                                         | Consulting fees                                                                                                                                                                | Boehringer Ingelheim, AstraZeneca, Merck,                                                    | Made to myself                                                                      |

|    |                                                                                                              |                                           |                |
|----|--------------------------------------------------------------------------------------------------------------|-------------------------------------------|----------------|
|    |                                                                                                              | Cybrex, MoreHealth,<br>ResearchToPractice |                |
|    |                                                                                                              |                                           |                |
| 5  | Payment or honoraria for lectures, presentations, speakers bureaus, manuscript writing or educational events | _____ None                                |                |
|    |                                                                                                              |                                           |                |
| 6  | Payment for expert testimony                                                                                 | _____ None                                |                |
|    |                                                                                                              |                                           |                |
| 7  | Support for attending meetings and/or travel                                                                 | Philips/Elekta                            | Made to myself |
|    |                                                                                                              |                                           |                |
| 8  | Patents planned, issued or pending                                                                           | _____ None                                |                |
|    |                                                                                                              |                                           |                |
| 9  | Participation on a Data Safety Monitoring Board or Advisory Board                                            | Merck                                     |                |
|    |                                                                                                              |                                           |                |
| 10 | Leadership or fiduciary role in other board, society, committee or advocacy group, paid or unpaid            | _____ None                                |                |
|    |                                                                                                              |                                           |                |
| 11 | Stock or stock options                                                                                       | _____ None                                |                |
|    |                                                                                                              |                                           |                |
| 12 | Receipt of equipment, materials, drugs, medical writing, gifts or other services                             | _____ None                                |                |
|    |                                                                                                              |                                           |                |
| 13 | Other financial or non-financial interests                                                                   | _____ None                                |                |
|    |                                                                                                              |                                           |                |

Please summarize the above conflict of interest in the following box:

AR received grants to his institution from Boehringer Ingelheim, Pfizer, AstraZeneca, Varian Medical Systems, and Merck; and personal grants from Boehringer Ingelheim, AstraZeneca, Merck, Cybrex, MoreHealth, ResearchToPractice, and Philips/Elekta.

Please place an "X" next to the following statement to indicate your agreement:

X  I certify that I have answered every question and have not altered the wording of any of the questions on this form.

## ICMJE DISCLOSURE FORM

Date: August 2, 2021

Your Name: Annemarie Shepherd

Manuscript Title: The Therapeutic Relevance of a *BRCA2* Mutation in a Patient with Recurrent Thymoma: A Case Report

Manuscript number (if known): \_\_\_\_\_

In the interest of transparency, we ask you to disclose all relationships/activities/interests listed below that are related to the content of your manuscript. "Related" means any relation with for-profit or not-for-profit third parties whose interests may be affected by the content of the manuscript. Disclosure represents a commitment to transparency and does not necessarily indicate a bias. If you are in doubt about whether to list a relationship/activity/interest, it is preferable that you do so.

The following questions apply to the author's relationships/activities/interests as they relate to the current manuscript only.

The author's relationships/activities/interests should be defined broadly. For example, if your manuscript pertains to the epidemiology of hypertension, you should declare all relationships with manufacturers of antihypertensive medication, even if that medication is not mentioned in the manuscript.

In item #1 below, report all support for the work reported in this manuscript without time limit. For all other items, the time frame for disclosure is the past 36 months.

|                                                           |                                                                                                                                                                                | Name all entities with whom you have this relationship or indicate none (add rows as needed) | Specifications/Comments (e.g., if payments were made to you or to your institution) |
|-----------------------------------------------------------|--------------------------------------------------------------------------------------------------------------------------------------------------------------------------------|----------------------------------------------------------------------------------------------|-------------------------------------------------------------------------------------|
| <b>Time frame: Since the initial planning of the work</b> |                                                                                                                                                                                |                                                                                              |                                                                                     |
| 1                                                         | All support for the present manuscript (e.g., funding, provision of study materials, medical writing, article processing charges, etc.)<br><b>No time limit for this item.</b> | X None                                                                                       |                                                                                     |
|                                                           |                                                                                                                                                                                |                                                                                              |                                                                                     |
|                                                           |                                                                                                                                                                                |                                                                                              |                                                                                     |
|                                                           |                                                                                                                                                                                |                                                                                              |                                                                                     |
|                                                           |                                                                                                                                                                                |                                                                                              |                                                                                     |
|                                                           |                                                                                                                                                                                |                                                                                              |                                                                                     |
|                                                           |                                                                                                                                                                                |                                                                                              |                                                                                     |
| <b>Time frame: past 36 months</b>                         |                                                                                                                                                                                |                                                                                              |                                                                                     |
| 2                                                         | Grants or contracts from any entity (if not indicated in item #1 above).                                                                                                       | X None                                                                                       |                                                                                     |
|                                                           |                                                                                                                                                                                |                                                                                              |                                                                                     |
|                                                           |                                                                                                                                                                                |                                                                                              |                                                                                     |
| 3                                                         | Royalties or licenses                                                                                                                                                          | X None                                                                                       |                                                                                     |
|                                                           |                                                                                                                                                                                |                                                                                              |                                                                                     |
|                                                           |                                                                                                                                                                                |                                                                                              |                                                                                     |

|    |                                                                                                              |        |  |
|----|--------------------------------------------------------------------------------------------------------------|--------|--|
| 4  | Consulting fees                                                                                              | X None |  |
|    |                                                                                                              |        |  |
|    |                                                                                                              |        |  |
| 5  | Payment or honoraria for lectures, presentations, speakers bureaus, manuscript writing or educational events | X None |  |
|    |                                                                                                              |        |  |
|    |                                                                                                              |        |  |
| 6  | Payment for expert testimony                                                                                 | X None |  |
|    |                                                                                                              |        |  |
|    |                                                                                                              |        |  |
| 7  | Support for attending meetings and/or travel                                                                 | X None |  |
|    |                                                                                                              |        |  |
|    |                                                                                                              |        |  |
| 8  | Patents planned, issued or pending                                                                           | X None |  |
|    |                                                                                                              |        |  |
|    |                                                                                                              |        |  |
| 9  | Participation on a Data Safety Monitoring Board or Advisory Board                                            | X None |  |
|    |                                                                                                              |        |  |
|    |                                                                                                              |        |  |
| 10 | Leadership or fiduciary role in other board, society, committee or advocacy group, paid or unpaid            | X None |  |
|    |                                                                                                              |        |  |
|    |                                                                                                              |        |  |
| 11 | Stock or stock options                                                                                       | X None |  |
|    |                                                                                                              |        |  |
|    |                                                                                                              |        |  |
| 12 | Receipt of equipment, materials, drugs, medical writing, gifts or other services                             | X None |  |
|    |                                                                                                              |        |  |
|    |                                                                                                              |        |  |
| 13 | Other financial or non-financial interests                                                                   | X None |  |
|    |                                                                                                              |        |  |
|    |                                                                                                              |        |  |

Please place an "X" next to the following statement to indicate your agreement:

X I certify that I have answered every question and have not altered the wording of any of the questions on this form.



## ICMJE DISCLOSURE FORM

Date: 2021-08-02

Your Name: Malgorzata Szolkowska

Manuscript Title: The Therapeutic Relevance of a *BRCA2* Mutation in a Patient with Recurrent Thymoma: A Case Report

Manuscript number (if known): \_\_\_\_\_

In the interest of transparency, we ask you to disclose all relationships/activities/interests listed below that are related to the content of your manuscript. "Related" means any relation with for-profit or not-for-profit third parties whose interests may be affected by the content of the manuscript. Disclosure represents a commitment to transparency and does not necessarily indicate a bias. If you are in doubt about whether to list a relationship/activity/interest, it is preferable that you do so.

The following questions apply to the author's relationships/activities/interests as they relate to the current manuscript only.

The author's relationships/activities/interests should be defined broadly. For example, if your manuscript pertains to the epidemiology of hypertension, you should declare all relationships with manufacturers of antihypertensive medication, even if that medication is not mentioned in the manuscript.

In item #1 below, report all support for the work reported in this manuscript without time limit. For all other items, the time frame for disclosure is the past 36 months.

|                                                           |                                                                                                                                                                                | Name all entities with whom you have this relationship or indicate none (add rows as needed) | Specifications/Comments (e.g., if payments were made to you or to your institution) |
|-----------------------------------------------------------|--------------------------------------------------------------------------------------------------------------------------------------------------------------------------------|----------------------------------------------------------------------------------------------|-------------------------------------------------------------------------------------|
| <b>Time frame: Since the initial planning of the work</b> |                                                                                                                                                                                |                                                                                              |                                                                                     |
| 1                                                         | All support for the present manuscript (e.g., funding, provision of study materials, medical writing, article processing charges, etc.)<br><b>No time limit for this item.</b> | ___ None                                                                                     |                                                                                     |
|                                                           |                                                                                                                                                                                |                                                                                              |                                                                                     |
|                                                           |                                                                                                                                                                                |                                                                                              |                                                                                     |
|                                                           |                                                                                                                                                                                |                                                                                              |                                                                                     |
|                                                           |                                                                                                                                                                                |                                                                                              |                                                                                     |
|                                                           |                                                                                                                                                                                |                                                                                              |                                                                                     |
| <b>Time frame: past 36 months</b>                         |                                                                                                                                                                                |                                                                                              |                                                                                     |
| 2                                                         | Grants or contracts from any entity (if not indicated in item #1 above).                                                                                                       | ___ None                                                                                     |                                                                                     |
|                                                           |                                                                                                                                                                                |                                                                                              |                                                                                     |
| 3                                                         | Royalties or licenses                                                                                                                                                          | ___ None                                                                                     |                                                                                     |
|                                                           |                                                                                                                                                                                |                                                                                              |                                                                                     |

|    |                                                                                                              |                               |  |
|----|--------------------------------------------------------------------------------------------------------------|-------------------------------|--|
|    |                                                                                                              |                               |  |
| 4  | Consulting fees                                                                                              | <input type="checkbox"/> None |  |
|    |                                                                                                              |                               |  |
|    |                                                                                                              |                               |  |
| 5  | Payment or honoraria for lectures, presentations, speakers bureaus, manuscript writing or educational events | <input type="checkbox"/> None |  |
|    |                                                                                                              |                               |  |
|    |                                                                                                              |                               |  |
| 6  | Payment for expert testimony                                                                                 | <input type="checkbox"/> None |  |
|    |                                                                                                              |                               |  |
|    |                                                                                                              |                               |  |
| 7  | Support for attending meetings and/or travel                                                                 | <input type="checkbox"/> None |  |
|    |                                                                                                              |                               |  |
|    |                                                                                                              |                               |  |
| 8  | Patents planned, issued or pending                                                                           | <input type="checkbox"/> None |  |
|    |                                                                                                              |                               |  |
|    |                                                                                                              |                               |  |
| 9  | Participation on a Data Safety Monitoring Board or Advisory Board                                            | <input type="checkbox"/> None |  |
|    |                                                                                                              |                               |  |
|    |                                                                                                              |                               |  |
| 10 | Leadership or fiduciary role in other board, society, committee or advocacy group, paid or unpaid            | <input type="checkbox"/> None |  |
|    |                                                                                                              |                               |  |
|    |                                                                                                              |                               |  |
| 11 | Stock or stock options                                                                                       | <input type="checkbox"/> None |  |
|    |                                                                                                              |                               |  |
|    |                                                                                                              |                               |  |
| 12 | Receipt of equipment, materials, drugs, medical writing, gifts or other services                             | <input type="checkbox"/> None |  |
|    |                                                                                                              |                               |  |
|    |                                                                                                              |                               |  |
| 13 | Other financial or non-financial interests                                                                   | <input type="checkbox"/> None |  |
|    |                                                                                                              |                               |  |
|    |                                                                                                              |                               |  |

Please place an "X" next to the following statement to indicate your agreement:

I certify that I have answered every question and have not altered the wording of any of the questions on this form.

  
Małgorzata Szolkowska

## ICMJE DISCLOSURE FORM

Date: 7/30/2021

Your Name: Anja C. Roden, MD

Manuscript Title: **The Therapeutic Relevance of a *BRCA2* Mutation in a Patient with Recurrent Thymoma: A Case Report**

Manuscript number (if known): \_\_\_\_\_

In the interest of transparency, we ask you to disclose all relationships/activities/interests listed below that are related to the content of your manuscript. "Related" means any relation with for-profit or not-for-profit third parties whose interests may be affected by the content of the manuscript. Disclosure represents a commitment to transparency and does not necessarily indicate a bias. If you are in doubt about whether to list a relationship/activity/interest, it is preferable that you do so.

The following questions apply to the author's relationships/activities/interests as they relate to the **current manuscript only**.

The author's relationships/activities/interests should be **defined broadly**. For example, if your manuscript pertains to the epidemiology of hypertension, you should declare all relationships with manufacturers of antihypertensive medication, even if that medication is not mentioned in the manuscript.

In item #1 below, report all support for the work reported in this manuscript without time limit. For all other items, the time frame for disclosure is the past 36 months.

|                                                           |                                                                                                                                                                                | Name all entities with whom you have this relationship or indicate none (add rows as needed) | Specifications/Comments (e.g., if payments were made to you or to your institution) |
|-----------------------------------------------------------|--------------------------------------------------------------------------------------------------------------------------------------------------------------------------------|----------------------------------------------------------------------------------------------|-------------------------------------------------------------------------------------|
| <b>Time frame: Since the initial planning of the work</b> |                                                                                                                                                                                |                                                                                              |                                                                                     |
| 1                                                         | All support for the present manuscript (e.g., funding, provision of study materials, medical writing, article processing charges, etc.)<br><b>No time limit for this item.</b> | <input checked="" type="checkbox"/> None                                                     |                                                                                     |
| <b>Time frame: past 36 months</b>                         |                                                                                                                                                                                |                                                                                              |                                                                                     |
| 2                                                         | Grants or contracts from any entity (if not indicated in item #1 above).                                                                                                       | <input checked="" type="checkbox"/> None                                                     |                                                                                     |
| 3                                                         | Royalties or licenses                                                                                                                                                          | Up-to-date                                                                                   | Received yearly royalties for contribution to topic of thymic epithelial tumors     |
| 4                                                         | Consulting fees                                                                                                                                                                | <input checked="" type="checkbox"/> None                                                     |                                                                                     |
| 5                                                         | Payment or honoraria for lectures, presentations,                                                                                                                              | <input checked="" type="checkbox"/> None                                                     |                                                                                     |

|    |                                                                                                            |                                          |  |
|----|------------------------------------------------------------------------------------------------------------|------------------------------------------|--|
|    | speakers bureaus,<br>manuscript writing or<br>educational events                                           |                                          |  |
| 6  | Payment for expert<br>testimony                                                                            | <input checked="" type="checkbox"/> None |  |
|    |                                                                                                            |                                          |  |
|    |                                                                                                            |                                          |  |
| 7  | Support for attending<br>meetings and/or travel                                                            | <input checked="" type="checkbox"/> None |  |
|    |                                                                                                            |                                          |  |
|    |                                                                                                            |                                          |  |
| 8  | Patents planned, issued or<br>pending                                                                      | <input checked="" type="checkbox"/> None |  |
|    |                                                                                                            |                                          |  |
|    |                                                                                                            |                                          |  |
| 9  | Participation on a Data<br>Safety Monitoring Board or<br>Advisory Board                                    | <input checked="" type="checkbox"/> None |  |
|    |                                                                                                            |                                          |  |
|    |                                                                                                            |                                          |  |
| 10 | Leadership or fiduciary role<br>in other board, society,<br>committee or advocacy<br>group, paid or unpaid | <input checked="" type="checkbox"/> None |  |
|    |                                                                                                            |                                          |  |
|    |                                                                                                            |                                          |  |
| 11 | Stock or stock options                                                                                     | <input checked="" type="checkbox"/> None |  |
|    |                                                                                                            |                                          |  |
|    |                                                                                                            |                                          |  |
| 12 | Receipt of equipment,<br>materials, drugs, medical<br>writing, gifts or other<br>services                  | <input checked="" type="checkbox"/> None |  |
|    |                                                                                                            |                                          |  |
|    |                                                                                                            |                                          |  |
| 13 | Other financial or non-<br>financial interests                                                             | <input checked="" type="checkbox"/> None |  |
|    |                                                                                                            |                                          |  |
|    |                                                                                                            |                                          |  |

Please summarize the above conflict of interest in the following box:

ACR received yearly royalties from Up-to-Date.

Please place an "X" next to the following statement to indicate your agreement:

I certify that I have answered every question and have not altered the wording of any of the questions on this form.

## ICMJE DISCLOSURE FORM

Date: August the 5<sup>th</sup>, 2021

Your Name: Mirella Marino

Manuscript Title: **The Therapeutic Relevance of a *BRCA2* Mutation in a Patient with Recurrent Thymoma: A Case Report**

Manuscript number (if known): \_\_\_\_\_

In the interest of transparency, we ask you to disclose all relationships/activities/interests listed below that are related to the content of your manuscript. "Related" means any relation with for-profit or not-for-profit third parties whose interests may be affected by the content of the manuscript. Disclosure represents a commitment to transparency and does not necessarily indicate a bias. If you are in doubt about whether to list a relationship/activity/interest, it is preferable that you do so.

The following questions apply to the author's relationships/activities/interests as they relate to the current manuscript only.

The author's relationships/activities/interests should be defined broadly. For example, if your manuscript pertains to the epidemiology of hypertension, you should declare all relationships with manufacturers of antihypertensive medication, even if that medication is not mentioned in the manuscript.

In item #1 below, report all support for the work reported in this manuscript without time limit. For all other items, the time frame for disclosure is the past 36 months.

|                                                           |                                                                                                                                                                                | Name all entities with whom you have this relationship or indicate none (add rows as needed) | Specifications/Comments (e.g., if payments were made to you or to your institution) |
|-----------------------------------------------------------|--------------------------------------------------------------------------------------------------------------------------------------------------------------------------------|----------------------------------------------------------------------------------------------|-------------------------------------------------------------------------------------|
| <b>Time frame: Since the initial planning of the work</b> |                                                                                                                                                                                |                                                                                              |                                                                                     |
| 1                                                         | All support for the present manuscript (e.g., funding, provision of study materials, medical writing, article processing charges, etc.)<br><b>No time limit for this item.</b> | <input checked="" type="checkbox"/> None                                                     |                                                                                     |
|                                                           |                                                                                                                                                                                |                                                                                              |                                                                                     |
|                                                           |                                                                                                                                                                                |                                                                                              |                                                                                     |
|                                                           |                                                                                                                                                                                |                                                                                              |                                                                                     |
| <b>Time frame: past 36 months</b>                         |                                                                                                                                                                                |                                                                                              |                                                                                     |
| 2                                                         | Grants or contracts from any entity (if not indicated in item #1 above).                                                                                                       | <input checked="" type="checkbox"/> None                                                     |                                                                                     |
|                                                           |                                                                                                                                                                                |                                                                                              |                                                                                     |
| 3                                                         | Royalties or licenses                                                                                                                                                          | <input type="checkbox"/> None                                                                |                                                                                     |
| 4                                                         | Consulting fees                                                                                                                                                                | <input checked="" type="checkbox"/> None                                                     |                                                                                     |
| 5                                                         | Payment or honoraria for lectures, presentations, speakers bureaus,                                                                                                            | <input checked="" type="checkbox"/> None                                                     |                                                                                     |
|                                                           |                                                                                                                                                                                |                                                                                              |                                                                                     |

|    |                                                                                                   |                                          |  |
|----|---------------------------------------------------------------------------------------------------|------------------------------------------|--|
|    | manuscript writing or educational events                                                          |                                          |  |
| 6  | Payment for expert testimony                                                                      | <input checked="" type="checkbox"/> None |  |
|    |                                                                                                   |                                          |  |
|    |                                                                                                   |                                          |  |
| 7  | Support for attending meetings and/or travel                                                      | <input checked="" type="checkbox"/> None |  |
|    |                                                                                                   |                                          |  |
|    |                                                                                                   |                                          |  |
| 8  | Patents planned, issued or pending                                                                | <input checked="" type="checkbox"/> None |  |
|    |                                                                                                   |                                          |  |
|    |                                                                                                   |                                          |  |
| 9  | Participation on a Data Safety Monitoring Board or Advisory Board                                 | <input checked="" type="checkbox"/> None |  |
|    |                                                                                                   |                                          |  |
|    |                                                                                                   |                                          |  |
| 10 | Leadership or fiduciary role in other board, society, committee or advocacy group, paid or unpaid | <input checked="" type="checkbox"/> None |  |
|    |                                                                                                   |                                          |  |
|    |                                                                                                   |                                          |  |
| 11 | Stock or stock options                                                                            | <input checked="" type="checkbox"/> None |  |
|    |                                                                                                   |                                          |  |
|    |                                                                                                   |                                          |  |
| 12 | Receipt of equipment, materials, drugs, medical writing, gifts or other services                  | <input checked="" type="checkbox"/> None |  |
|    |                                                                                                   |                                          |  |
|    |                                                                                                   |                                          |  |
| 13 | Other financial or non-financial interests                                                        | <input checked="" type="checkbox"/> None |  |
|    |                                                                                                   |                                          |  |
|    |                                                                                                   |                                          |  |

Please summarize the above conflict of interest in the following box:

Please place an "X" next to the following statement to indicate your agreement:

X I certify that I have answered every question and have not altered the wording of any of the questions on this

Form.

*Thirilla Sternis*

ICMJE DISCLOSURE FORM

Date: August 1, 2021

Your Name: Noriyuki Tomiyama

Manuscript Title: The Therapeutic Relevance of a *BRCA2* Mutation in a Patient with Recurrent Thymoma: A Case Report

Manuscript number (if known): \_\_\_\_\_

In the interest of transparency, we ask you to disclose all relationships/activities/interests listed below that are related to the content of your manuscript. "Related" means any relation with for-profit or not-for-profit third parties whose interests may be affected by the content of the manuscript. Disclosure represents a commitment to transparency and does not necessarily indicate a bias. If you are in doubt about whether to list a relationship/activity/interest, it is preferable that you do so.

The following questions apply to the author's relationships/activities/interests as they relate to the current manuscript only.

The author's relationships/activities/interests should be defined broadly. For example, if your manuscript pertains to the epidemiology of hypertension, you should declare all relationships with manufacturers of antihypertensive medication, even if that medication is not mentioned in the manuscript.

In item #1 below, report all support for the work reported in this manuscript without time limit. For all other items, the time frame for disclosure is the past 36 months.

|                                                           |                                                                                                                                                                                | Name all entities with whom you have this relationship or indicate none (add rows as needed) | Specifications/Comments (e.g., if payments were made to you or to your institution) |
|-----------------------------------------------------------|--------------------------------------------------------------------------------------------------------------------------------------------------------------------------------|----------------------------------------------------------------------------------------------|-------------------------------------------------------------------------------------|
| <b>Time frame: Since the initial planning of the work</b> |                                                                                                                                                                                |                                                                                              |                                                                                     |
| 1                                                         | All support for the present manuscript (e.g., funding, provision of study materials, medical writing, article processing charges, etc.)<br><b>No time limit for this item.</b> | <input checked="" type="checkbox"/> None                                                     |                                                                                     |
|                                                           |                                                                                                                                                                                |                                                                                              |                                                                                     |
|                                                           |                                                                                                                                                                                |                                                                                              |                                                                                     |
|                                                           |                                                                                                                                                                                |                                                                                              |                                                                                     |
|                                                           |                                                                                                                                                                                |                                                                                              |                                                                                     |
|                                                           |                                                                                                                                                                                |                                                                                              |                                                                                     |
| <b>Time frame: past 36 months</b>                         |                                                                                                                                                                                |                                                                                              |                                                                                     |
| 2                                                         | Grants or contracts from any entity (if not indicated in item #1 above).                                                                                                       | <input checked="" type="checkbox"/> None                                                     |                                                                                     |
|                                                           |                                                                                                                                                                                |                                                                                              |                                                                                     |
|                                                           |                                                                                                                                                                                |                                                                                              |                                                                                     |
| 3                                                         | Royalties or licenses                                                                                                                                                          | <input checked="" type="checkbox"/> None                                                     |                                                                                     |
|                                                           |                                                                                                                                                                                |                                                                                              |                                                                                     |
|                                                           |                                                                                                                                                                                |                                                                                              |                                                                                     |

|    |                                                                                                              |                                          |  |
|----|--------------------------------------------------------------------------------------------------------------|------------------------------------------|--|
| 4  | Consulting fees                                                                                              | <input checked="" type="checkbox"/> None |  |
|    |                                                                                                              |                                          |  |
|    |                                                                                                              |                                          |  |
| 5  | Payment or honoraria for lectures, presentations, speakers bureaus, manuscript writing or educational events | <input checked="" type="checkbox"/> None |  |
|    |                                                                                                              |                                          |  |
|    |                                                                                                              |                                          |  |
| 6  | Payment for expert testimony                                                                                 | <input checked="" type="checkbox"/> None |  |
|    |                                                                                                              |                                          |  |
|    |                                                                                                              |                                          |  |
| 7  | Support for attending meetings and/or travel                                                                 | <input checked="" type="checkbox"/> None |  |
|    |                                                                                                              |                                          |  |
|    |                                                                                                              |                                          |  |
| 8  | Patents planned, issued or pending                                                                           | <input checked="" type="checkbox"/> None |  |
|    |                                                                                                              |                                          |  |
|    |                                                                                                              |                                          |  |
| 9  | Participation on a Data Safety Monitoring Board or Advisory Board                                            | <input checked="" type="checkbox"/> None |  |
|    |                                                                                                              |                                          |  |
|    |                                                                                                              |                                          |  |
| 10 | Leadership or fiduciary role in other board, society, committee or advocacy group, paid or unpaid            | <input checked="" type="checkbox"/> None |  |
|    |                                                                                                              |                                          |  |
|    |                                                                                                              |                                          |  |
| 11 | Stock or stock options                                                                                       | <input checked="" type="checkbox"/> None |  |
|    |                                                                                                              |                                          |  |
|    |                                                                                                              |                                          |  |
| 12 | Receipt of equipment, materials, drugs, medical writing, gifts or other services                             | <input checked="" type="checkbox"/> None |  |
|    |                                                                                                              |                                          |  |
|    |                                                                                                              |                                          |  |
| 13 | Other financial or non-financial interests                                                                   | <input checked="" type="checkbox"/> None |  |
|    |                                                                                                              |                                          |  |
|    |                                                                                                              |                                          |  |

Please place an "X" next to the following statement to indicate your agreement:

I certify that I have answered every question and have not altered the wording of any of the questions on this form.



## ICMJE DISCLOSURE FORM

Date: 31 July 2021

Your Name: David Ball

Manuscript Title: The Therapeutic Relevance of a *BRCA2* Mutation in a Patient with Recurrent Thymoma: A Case Report

Manuscript number (if known): \_\_\_\_\_

In the interest of transparency, we ask you to disclose all relationships/activities/interests listed below that are related to the content of your manuscript. "Related" means any relation with for-profit or not-for-profit third parties whose interests may be affected by the content of the manuscript. Disclosure represents a commitment to transparency and does not necessarily indicate a bias. If you are in doubt about whether to list a relationship/activity/interest, it is preferable that you do so.

The following questions apply to the author's relationships/activities/interests as they relate to the current manuscript only.

The author's relationships/activities/interests should be defined broadly. For example, if your manuscript pertains to the epidemiology of hypertension, you should declare all relationships with manufacturers of antihypertensive medication, even if that medication is not mentioned in the manuscript.

In item #1 below, report all support for the work reported in this manuscript without time limit. For all other items, the time frame for disclosure is the past 36 months.

|                                                           |                                                                                                                                                                                | Name all entities with whom you have this relationship or indicate none (add rows as needed) | Specifications/Comments (e.g., if payments were made to you or to your institution) |
|-----------------------------------------------------------|--------------------------------------------------------------------------------------------------------------------------------------------------------------------------------|----------------------------------------------------------------------------------------------|-------------------------------------------------------------------------------------|
| <b>Time frame: Since the initial planning of the work</b> |                                                                                                                                                                                |                                                                                              |                                                                                     |
| 1                                                         | All support for the present manuscript (e.g., funding, provision of study materials, medical writing, article processing charges, etc.)<br><b>No time limit for this item.</b> | ___ None                                                                                     |                                                                                     |
|                                                           |                                                                                                                                                                                |                                                                                              |                                                                                     |
|                                                           |                                                                                                                                                                                |                                                                                              |                                                                                     |
|                                                           |                                                                                                                                                                                |                                                                                              |                                                                                     |
| <b>Time frame: past 36 months</b>                         |                                                                                                                                                                                |                                                                                              |                                                                                     |
| 2                                                         | Grants or contracts from any entity (if not indicated in item #1 above).                                                                                                       | ___ None                                                                                     |                                                                                     |
|                                                           |                                                                                                                                                                                |                                                                                              |                                                                                     |
| 3                                                         | Royalties or licenses                                                                                                                                                          | ___ None                                                                                     |                                                                                     |
|                                                           |                                                                                                                                                                                |                                                                                              |                                                                                     |
| 4                                                         | Consulting fees                                                                                                                                                                | ___ None                                                                                     |                                                                                     |
| 5                                                         | Payment or honoraria for lectures, presentations,                                                                                                                              | ___ Astra Zeneca                                                                             | Fees paid to me                                                                     |

|    |                                                                                                            |          |  |
|----|------------------------------------------------------------------------------------------------------------|----------|--|
|    | speakers bureaus,<br>manuscript writing or<br>educational events                                           |          |  |
| 6  | Payment for expert<br>testimony                                                                            | ___ None |  |
|    |                                                                                                            |          |  |
|    |                                                                                                            |          |  |
| 7  | Support for attending<br>meetings and/or travel                                                            | ___ None |  |
|    |                                                                                                            |          |  |
|    |                                                                                                            |          |  |
| 8  | Patents planned, issued or<br>pending                                                                      | ___ None |  |
|    |                                                                                                            |          |  |
|    |                                                                                                            |          |  |
| 9  | Participation on a Data<br>Safety Monitoring Board or<br>Advisory Board                                    | ___ None |  |
|    |                                                                                                            |          |  |
|    |                                                                                                            |          |  |
| 10 | Leadership or fiduciary role<br>in other board, society,<br>committee or advocacy<br>group, paid or unpaid | ___ None |  |
|    |                                                                                                            |          |  |
|    |                                                                                                            |          |  |
| 11 | Stock or stock options                                                                                     | ___ None |  |
|    |                                                                                                            |          |  |
|    |                                                                                                            |          |  |
| 12 | Receipt of equipment,<br>materials, drugs, medical<br>writing, gifts or other<br>services                  | ___ None |  |
|    |                                                                                                            |          |  |
|    |                                                                                                            |          |  |
| 13 | Other financial or non-<br>financial interests                                                             | ___ None |  |
|    |                                                                                                            |          |  |
|    |                                                                                                            |          |  |

Please summarize the above conflict of interest in the following box:

|                                             |
|---------------------------------------------|
| DB received an honorarium from AstraZeneca. |
|---------------------------------------------|

Please place an "X" next to the following statement to indicate your agreement:

I certify that I have answered every question and have not altered the wording of any of the questions on this form.

## ICMJE DISCLOSURE FORM

Date: 2021 07 30

Your Name: Conrad Falkson

Manuscript Title: **The Therapeutic Relevance of a *BRCA2* Mutation in a Patient with Recurrent Thymoma: A Case Report**

Manuscript number (if known): \_\_\_\_\_

In the interest of transparency, we ask you to disclose all relationships/activities/interests listed below that are related to the content of your manuscript. "Related" means any relation with for-profit or not-for-profit third parties whose interests may be affected by the content of the manuscript. Disclosure represents a commitment to transparency and does not necessarily indicate a bias. If you are in doubt about whether to list a relationship/activity/interest, it is preferable that you do so.

The following questions apply to the author's relationships/activities/interests as they relate to the current manuscript only.

The author's relationships/activities/interests should be defined broadly. For example, if your manuscript pertains to the epidemiology of hypertension, you should declare all relationships with manufacturers of antihypertensive medication, even if that medication is not mentioned in the manuscript.

In item #1 below, report all support for the work reported in this manuscript without time limit. For all other items, the time frame for disclosure is the past 36 months.

|                                                           |                                                                                                                                                                                | Name all entities with whom you have this relationship or indicate none (add rows as needed) | Specifications/Comments (e.g., if payments were made to you or to your institution) |
|-----------------------------------------------------------|--------------------------------------------------------------------------------------------------------------------------------------------------------------------------------|----------------------------------------------------------------------------------------------|-------------------------------------------------------------------------------------|
| <b>Time frame: Since the initial planning of the work</b> |                                                                                                                                                                                |                                                                                              |                                                                                     |
| 1                                                         | All support for the present manuscript (e.g., funding, provision of study materials, medical writing, article processing charges, etc.)<br><b>No time limit for this item.</b> | X None                                                                                       |                                                                                     |
|                                                           |                                                                                                                                                                                |                                                                                              |                                                                                     |
|                                                           |                                                                                                                                                                                |                                                                                              |                                                                                     |
|                                                           |                                                                                                                                                                                |                                                                                              |                                                                                     |
| <b>Time frame: past 36 months</b>                         |                                                                                                                                                                                |                                                                                              |                                                                                     |
| 2                                                         | Grants or contracts from any entity (if not indicated in item #1 above).                                                                                                       | X None                                                                                       |                                                                                     |
|                                                           |                                                                                                                                                                                |                                                                                              |                                                                                     |
| 3                                                         | Royalties or licenses                                                                                                                                                          | X None                                                                                       |                                                                                     |
| 4                                                         | Consulting fees                                                                                                                                                                | X None                                                                                       |                                                                                     |
| 5                                                         | Payment or honoraria for lectures, presentations, speakers bureaus,                                                                                                            | X None                                                                                       |                                                                                     |
|                                                           |                                                                                                                                                                                |                                                                                              |                                                                                     |

|    |                                                                                                   |        |  |
|----|---------------------------------------------------------------------------------------------------|--------|--|
|    | manuscript writing or educational events                                                          |        |  |
| 6  | Payment for expert testimony                                                                      | X None |  |
|    |                                                                                                   |        |  |
| 7  | Support for attending meetings and/or travel                                                      | X None |  |
|    |                                                                                                   |        |  |
|    |                                                                                                   |        |  |
| 8  | Patents planned, issued or pending                                                                | X None |  |
|    |                                                                                                   |        |  |
|    |                                                                                                   |        |  |
| 9  | Participation on a Data Safety Monitoring Board or Advisory Board                                 | X None |  |
|    |                                                                                                   |        |  |
|    |                                                                                                   |        |  |
| 10 | Leadership or fiduciary role in other board, society, committee or advocacy group, paid or unpaid | X None |  |
|    |                                                                                                   |        |  |
|    |                                                                                                   |        |  |
| 11 | Stock or stock options                                                                            | X None |  |
|    |                                                                                                   |        |  |
|    |                                                                                                   |        |  |
| 12 | Receipt of equipment, materials, drugs, medical writing, gifts or other services                  | X None |  |
|    |                                                                                                   |        |  |
|    |                                                                                                   |        |  |
| 13 | Other financial or non-financial interests                                                        | X None |  |
|    |                                                                                                   |        |  |
|    |                                                                                                   |        |  |

Please place an "X" next to the following statement to indicate your agreement:

X I certify that I have answered every question and have not altered the wording of any of the questions on this form.

## ICMJE DISCLOSURE FORM

Date: July 30, 2021

Your Name: Arun Rajan

Manuscript Title: The Therapeutic Relevance of a *BRCA2* Mutation in a Patient with Recurrent Thymoma:  
A Case Report

Manuscript number (if known): NA

In the interest of transparency, we ask you to disclose all relationships/activities/interests listed below that are related to the content of your manuscript. "Related" means any relation with for-profit or not-for-profit third parties whose interests may be affected by the content of the manuscript. Disclosure represents a commitment to transparency and does not necessarily indicate a bias. If you are in doubt about whether to list a relationship/activity/interest, it is preferable that you do so.

The following questions apply to the author's relationships/activities/interests as they relate to the current manuscript only.

The author's relationships/activities/interests should be defined broadly. For example, if your manuscript pertains to the epidemiology of hypertension, you should declare all relationships with manufacturers of antihypertensive medication, even if that medication is not mentioned in the manuscript.

In item #1 below, report all support for the work reported in this manuscript without time limit. For all other items, the time frame for disclosure is the past 36 months.

|                                                           |                                                                                                                                                                                | Name all entities with whom you have this relationship or indicate none (add rows as needed) | Specifications/Comments (e.g., if payments were made to you or to your institution) |
|-----------------------------------------------------------|--------------------------------------------------------------------------------------------------------------------------------------------------------------------------------|----------------------------------------------------------------------------------------------|-------------------------------------------------------------------------------------|
| <b>Time frame: Since the initial planning of the work</b> |                                                                                                                                                                                |                                                                                              |                                                                                     |
| 1                                                         | All support for the present manuscript (e.g., funding, provision of study materials, medical writing, article processing charges, etc.)<br><b>No time limit for this item.</b> | __x__ None                                                                                   |                                                                                     |
|                                                           |                                                                                                                                                                                |                                                                                              |                                                                                     |
|                                                           |                                                                                                                                                                                |                                                                                              |                                                                                     |
|                                                           |                                                                                                                                                                                |                                                                                              |                                                                                     |
|                                                           |                                                                                                                                                                                |                                                                                              |                                                                                     |
|                                                           |                                                                                                                                                                                |                                                                                              |                                                                                     |
|                                                           |                                                                                                                                                                                |                                                                                              |                                                                                     |
| <b>Time frame: past 36 months</b>                         |                                                                                                                                                                                |                                                                                              |                                                                                     |
| 2                                                         | Grants or contracts from any entity (if not indicated in item #1 above).                                                                                                       | __x__ None                                                                                   |                                                                                     |
|                                                           |                                                                                                                                                                                |                                                                                              |                                                                                     |
|                                                           |                                                                                                                                                                                |                                                                                              |                                                                                     |
| 3                                                         | Royalties or licenses                                                                                                                                                          | __x__ None                                                                                   |                                                                                     |
|                                                           |                                                                                                                                                                                |                                                                                              |                                                                                     |
|                                                           |                                                                                                                                                                                |                                                                                              |                                                                                     |

|    |                                                                                                              |                                          |  |
|----|--------------------------------------------------------------------------------------------------------------|------------------------------------------|--|
| 4  | Consulting fees                                                                                              | <input checked="" type="checkbox"/> None |  |
|    |                                                                                                              |                                          |  |
|    |                                                                                                              |                                          |  |
| 5  | Payment or honoraria for lectures, presentations, speakers bureaus, manuscript writing or educational events | <input checked="" type="checkbox"/> None |  |
|    |                                                                                                              |                                          |  |
|    |                                                                                                              |                                          |  |
| 6  | Payment for expert testimony                                                                                 | <input checked="" type="checkbox"/> None |  |
|    |                                                                                                              |                                          |  |
|    |                                                                                                              |                                          |  |
| 7  | Support for attending meetings and/or travel                                                                 | <input checked="" type="checkbox"/> None |  |
|    |                                                                                                              |                                          |  |
|    |                                                                                                              |                                          |  |
| 8  | Patents planned, issued or pending                                                                           | <input checked="" type="checkbox"/> None |  |
|    |                                                                                                              |                                          |  |
|    |                                                                                                              |                                          |  |
| 9  | Participation on a Data Safety Monitoring Board or Advisory Board                                            | <input checked="" type="checkbox"/> None |  |
|    |                                                                                                              |                                          |  |
|    |                                                                                                              |                                          |  |
| 10 | Leadership or fiduciary role in other board, society, committee or advocacy group, paid or unpaid            | <input checked="" type="checkbox"/> None |  |
|    |                                                                                                              |                                          |  |
|    |                                                                                                              |                                          |  |
| 11 | Stock or stock options                                                                                       | <input checked="" type="checkbox"/> None |  |
|    |                                                                                                              |                                          |  |
|    |                                                                                                              |                                          |  |
| 12 | Receipt of equipment, materials, drugs, medical writing, gifts or other services                             | <input checked="" type="checkbox"/> None |  |
|    |                                                                                                              |                                          |  |
|    |                                                                                                              |                                          |  |
| 13 | Other financial or non-financial interests                                                                   | <input checked="" type="checkbox"/> None |  |
|    |                                                                                                              |                                          |  |
|    |                                                                                                              |                                          |  |

Please place an "X" next to the following statement to indicate your agreement:

I certify that I have answered every question and have not altered the wording of any of the questions on this form.
